# Supplementary material for: End-to-end assessment of fecal bacteriome analysis: from sample processing to DNA sequencing and bioinformatics results
Source: bioRxiv or medRxiv preprint supplement (doi:10.1101/646349), 2020-02-18
Supplement: Supplementary file [file media-1.pdf]

1 **Supplementary figures**

2

3

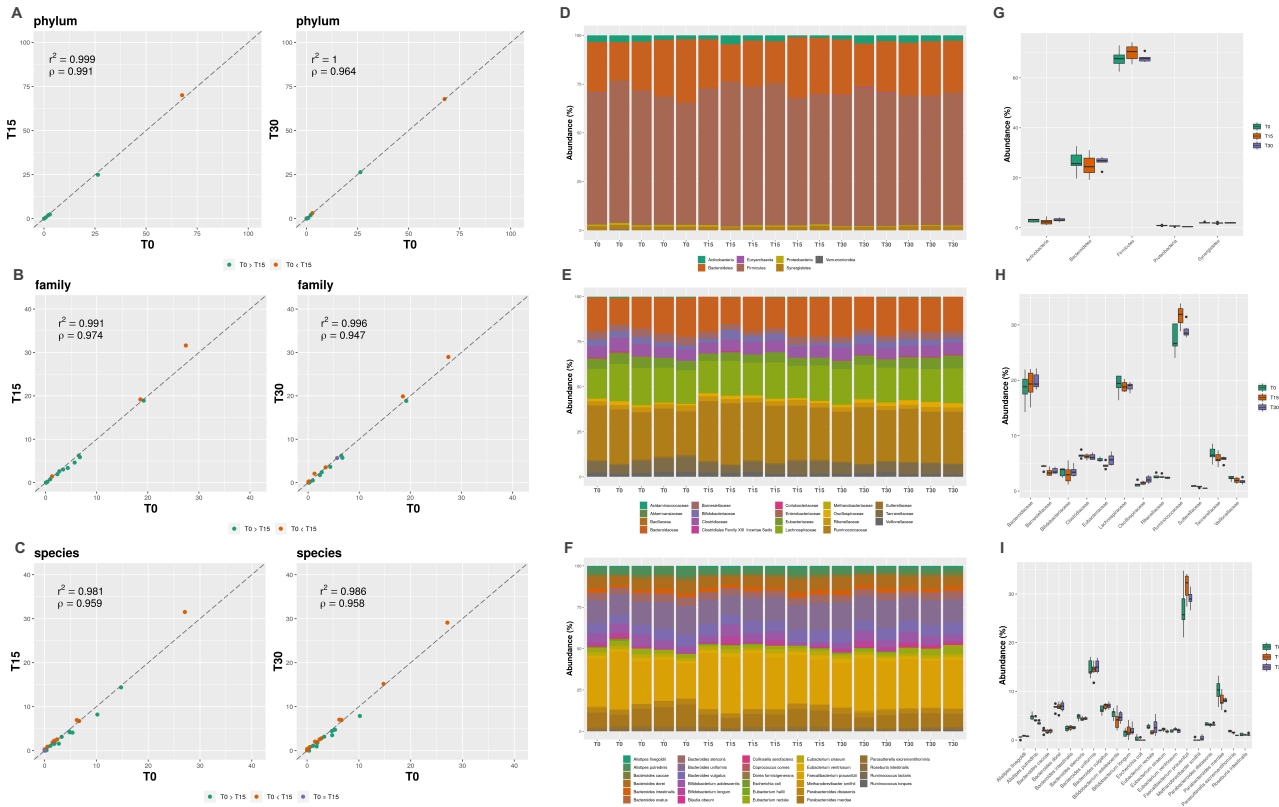

4

5

6 **Supplementary figure 1. Fecal sample storage and bacterial profile along 30 days.** Correlation  
7 analysis for T0-T15 and T0-T30 obtained results considering data with taxonomical assignment for  
8 **(A)** phylum, **(B)** family and **(C)** species. Pearson ( $r^2$ ) and Spearman ( $\rho$ ) correlations were calculated.  
9 Relative abundance bacterial profiles for each sample along with the 30 days storage, including sample  
10 replicates for **(D)** phylum, **(E)** family and **(F)** species. Boxplots showing abundances distributions and  
11 deviations in each storage time (T0, T15 and T30) for taxonomic levels of **(G)** phylum, **(H)** family  
12 and **(I)** species.

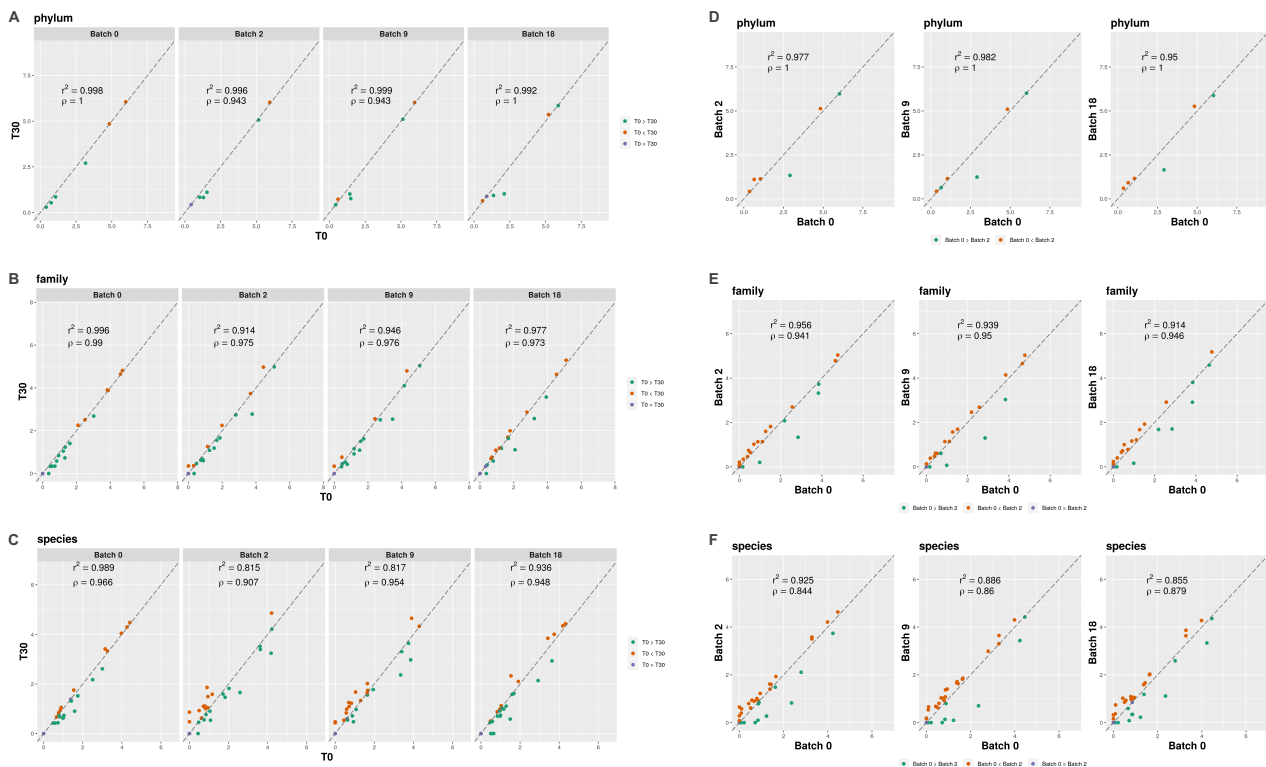

13

14

15 **Supplementary figure 2. NeoSampleZ batch effects assessment along 30 days of fecal sample**  
 16 **storage.** Correlations (Pearson ( $r^2$ ) and Spearman ( $\rho$ ) for bacterial profile before and after the 30 days  
 17 storage in different batches of NeoSampleZ lot production. Results are shown for taxonomic  
 18 assignments of **(A)** phylum, **(B)** family and **(C)** species. Also, correlations among different batches  
 19 were performed for the same taxonomic levels **(D)** phylum, **(E)** family and **(F)** species. High  
 20 correlation values  $r^2$  and  $\rho$  were obtained among the compared results.

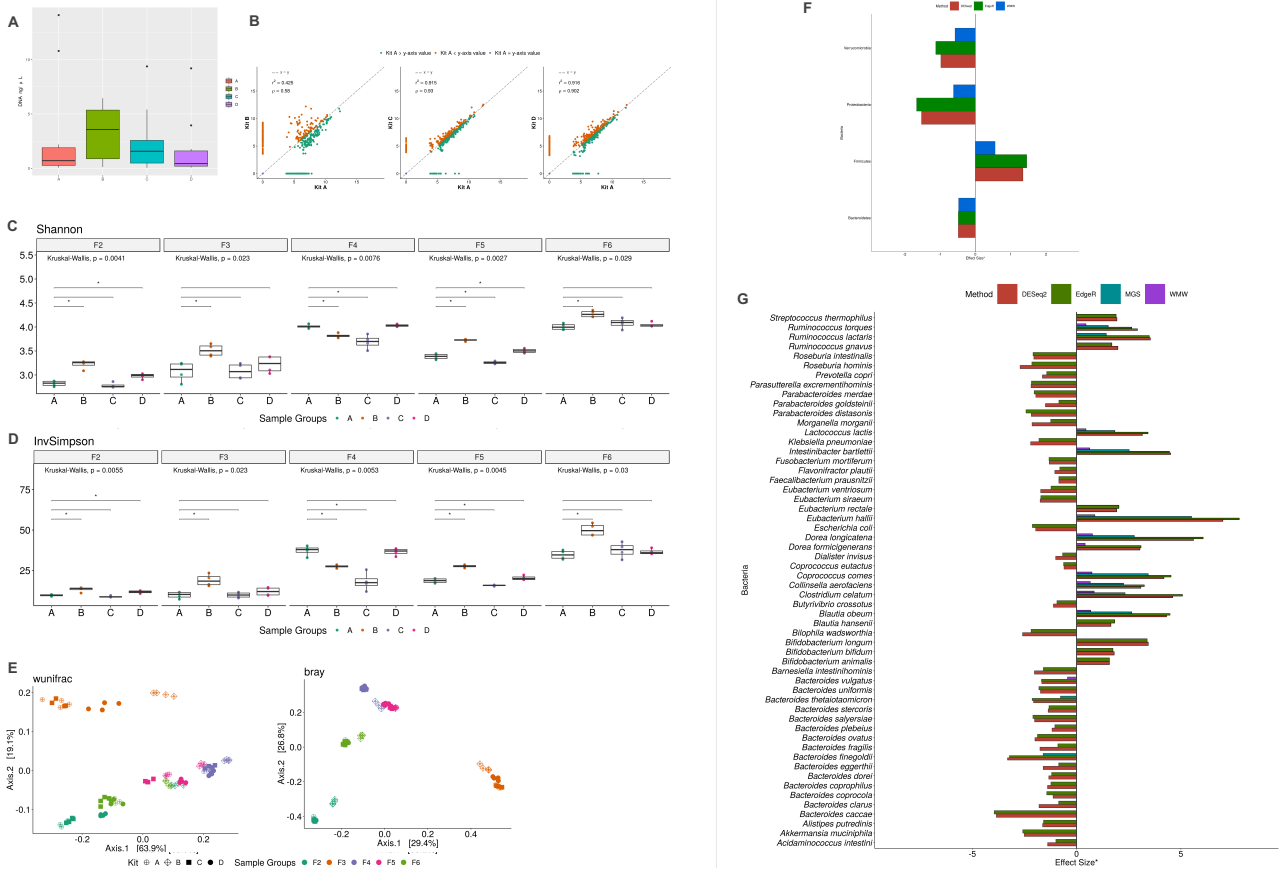

21

22 **Supplementary figure 3. Fecal DNA extraction results assessment for different kits.** Four  
 23 different extraction kits were evaluated A-DNeasy PowerSoil; B- DNeasy PowerSoil PRO; C-  
 24 DNeasy PowerSoil PRO modified (zirconium beads changed to silica beads) and D-DNeasy Power  
 25 Fecal. **(A)** Amounts of DNA extracted (ng/ul) were quantified using Picogreen (Invitrogen, USA). Kit  
 26 B presented the higher overall DNA amounts recovered. **(B)** An analysis correlation performed after  
 27 bacterial 16S rRNA gene sequencing revealed that kit B presents the most different results regarding  
 28 the sample bacterial composition compared to kit A ( $r^2=0.4$  and  $\rho=0.58$ ). Kits A, C and D have similar  
 29 and equivalent results ( $r^2$  and  $\rho > 0.91$ ). To better evaluate these differences among kits, Shannon **(C)**  
 30 and **(D)** InvSimpson alpha diversities analysis were performed for each subject separately. All samples  
 31 from the B kit presented significant differences (*Kruskall-Wallis*, *Wilcoxon*  $p < 0.05$ ), generally  
 32 showing higher alpha-diversity indexes. **(E)** Despite kits variations, beta-diversity analysis (weighted  
 33 UniFrac and Bray-Curtis) showed that the bacterial profile within an individual is much more  
 34 consistent than the method of extraction. However, it is clearly visible the deviations resulting from  
 35 fecal DNA extractions with B kit. Differential abundance analysis with DESeq2, EdgeR, MGS and  
 36 WMW were performed to identify which are the bacteria phylum **(F)** and species **(G)** deviating  
 37 between kit A and kit B. It was observed an increase of the phylum Firmicutes and a reduction for  
 38 Bacteroidetes, Proteobacteria and Verrucomicrobia for kit B. Also, most of the bacteria associated

39 with these phyla were affected and detected at least by two differential abundance methods used.

40 \*Effect sizes are fold-changes in log<sub>2</sub>scale, except for WMW which shows  $Z_{score}/\sqrt{N}$ .

41

42

43

44

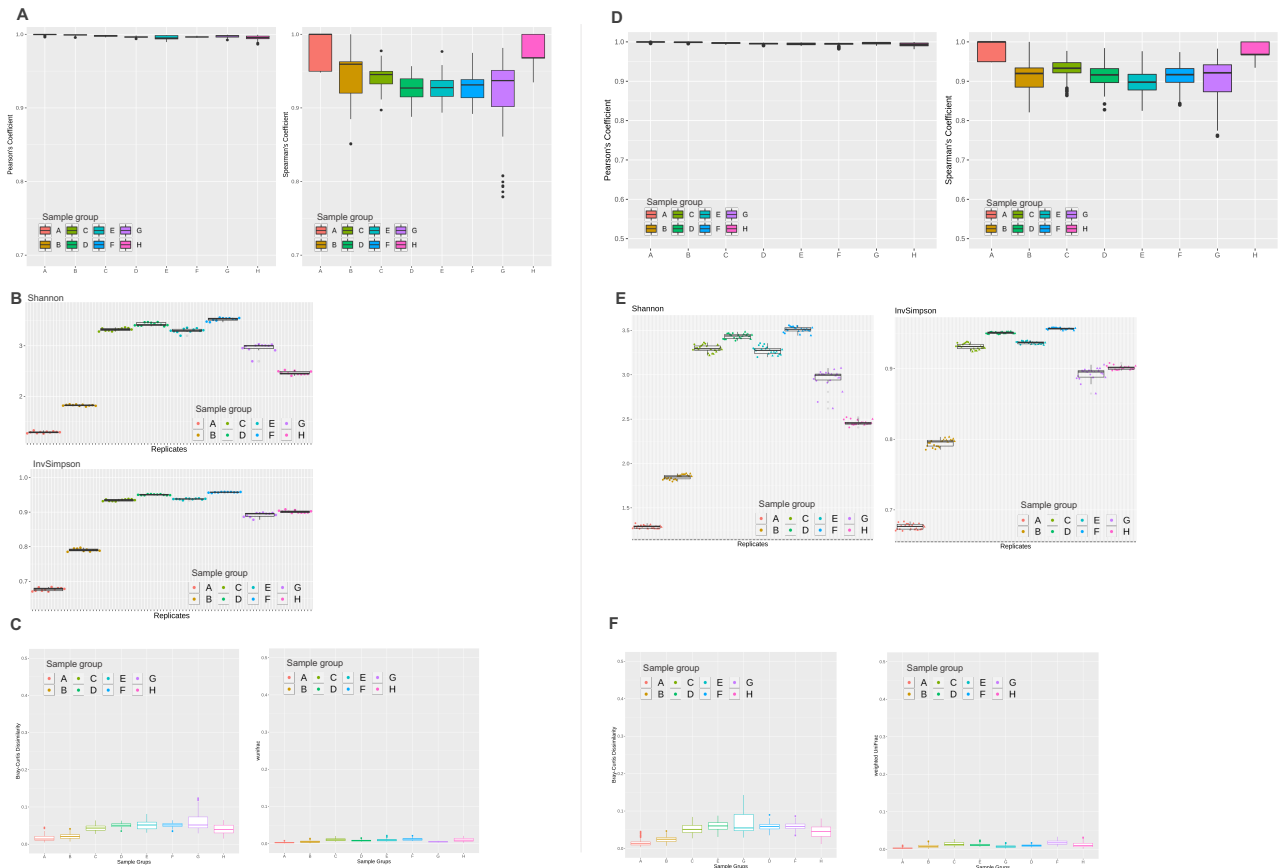

45

46 **Supplementary figure 4. Experimental reproducibility for amplicon DNA library preparation,**

47 **sequencing and Neotools Metabarcode analysis.** Different samples subsets for correlation, alpha

48 and beta diversity analysis. **(A-C)** - Subset of 11 replicates performed by only one operator, in a single

49 sequencing run. **(D-F)** - Subset of 11 replicates re-sequenced in a second run and analyzed along with

50 the first sequencing data.

51

52

53



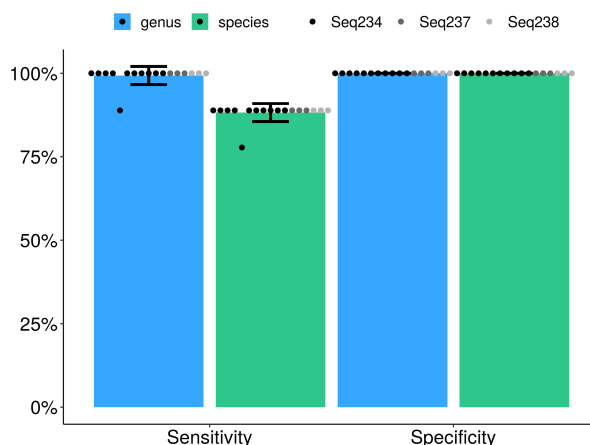

54

55 **Supplementary figure 5. Sensitivity and Specificity results achieved for library preparation,**

56 **DNA sequencing and Neotools Metabarcoding pipeline.** Sensitivity was evaluated for the ability to

57 recover the expected bacteria and specificity as the confidence level in bacterial detection among a

58 diverse microbial subset. A bacterial mock sample composed of *Acinetobacter baumannii*, *Bacillus*

59 *subtilis*, *Enterococcus faecalis*, *Escherichia coli*, *Klebsiella pneumoniae*, *Listeria monocytogenes*,

60 *Pseudomonas aeruginosa*, *Salmonella enterica* and *Staphylococcus aureus* was used. Results obtained

61 for 17 replicates performed by three different operators in three different sequencing runs. Values

62 achieved were 100% specificity at genus and species level,  $99.3 \pm 2.7\%$  sensibility at genus level and

63  $88.2 \pm 2.7\%$  at the species level. At the family level, specificity and sensibility was 100%. These

64 variations occurred mainly because *Listeria monocytogenes* 16S rRNA sequences do not have

65 phylogenetic resolution enough to Neotools Taxonomy Assignment algorithm classify them at

66 species. *Listeria* only has resolution to be classified at genus level. Additionally, some sequences from

67 the Enterobacterias do not have resolution to lower classification than family, this occurs mainly for

68 *Salmonella* sequences. Thus, sensibility variations are attributed to the lack of taxonomical resolution

69 in the 16S rRNA sequences evaluated. Also, a deviation observed is due to one replicate with the

70 lowest reads sequencing coverage (2,509 reads).

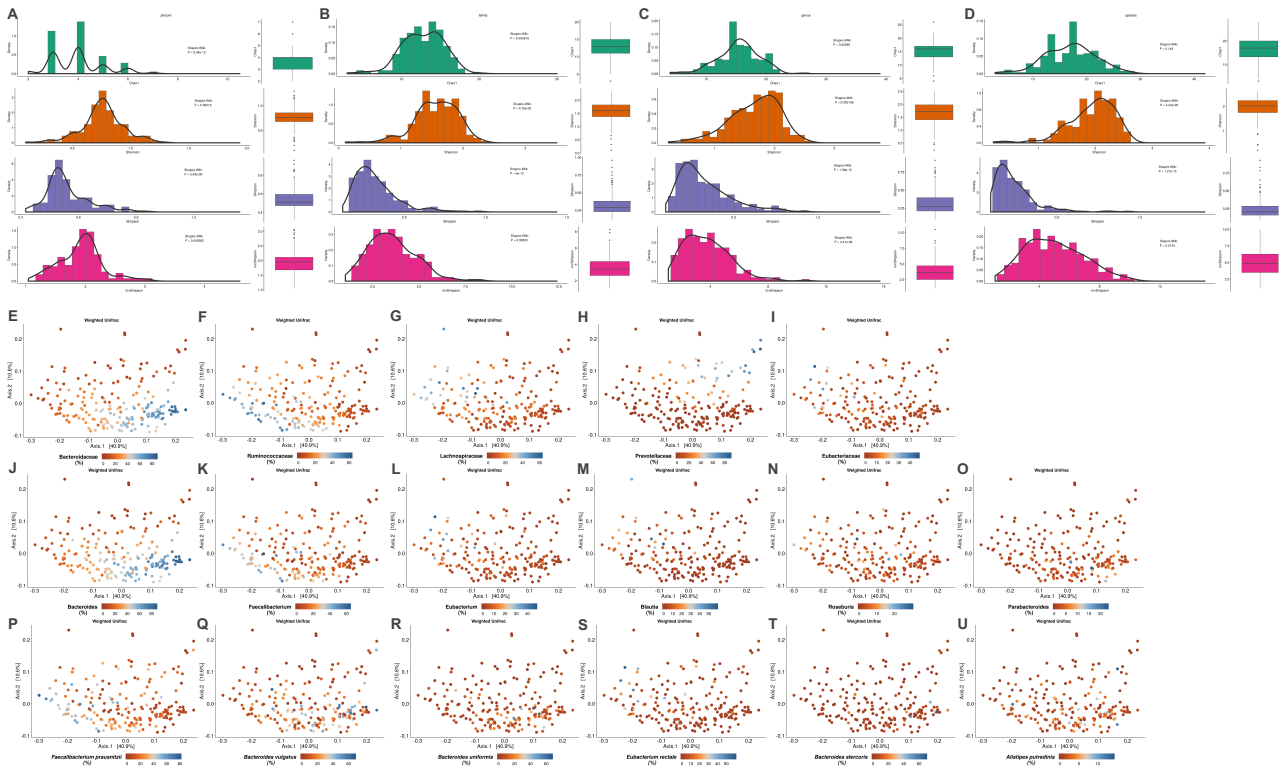

71

72 **Supplementary figure 6. Brazilian bacteriome diversities and distributions.** Besides the oligotype  
 73 alpha-diversity profiles for the 206 Brazilian fecal samples presented in the main text, we also generate  
 74 Chao1, Shannon, Simpson and InvSimpson indexes based in the Neotools taxonomic assignments for  
 75 (A) phylum, (B) family, (C) genus and (D) species. Results distributions were equivalent to  
 76 oligotypes, however considering these taxonomic ranks the diversity indexes decrease, given the  
 77 reduced variables after taxonomic assignment. Weighted UniFrac PCoA plots with populational  
 78 distributions were shown (E-I) family, (J-O) genus and (P-U) species most abundant in the Brazilian  
 79 dataset evaluated. Bacteroidaceae and Ruminococcaceae families have similar patterns related to their  
 80 phyla as well as Bacteroides and *Faecalibacterium* genus, also reflecting in *Faecalibacterium*  
 81 *prausnitzii*, *Eubacterium rectale*, *Bacteroides vulgatus* and *Bacteroides uniformis* species.  
 82 Prevotellaceae family seems to have a particular grouping for samples with higher abundance of this  
 83 family that should be further investigated.

84

85

86

87

88

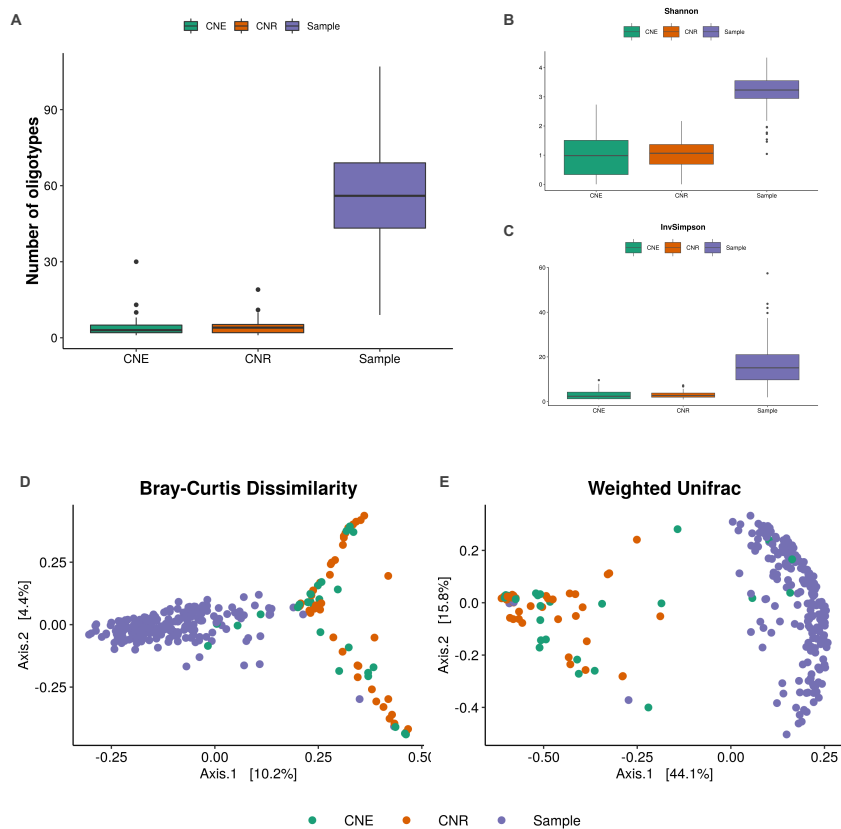

89

90

91 **Supplementary figure 7. Negative controls analysis.** 30 DNA extraction negative controls (CNE)  
 92 and 44 PCR reaction negative controls (CNR) were analyzed along with the 206 Brazilian fecal  
 93 samples. (A) After Neotools Metabarcoding analysis it can be observed that negative controls have a  
 94 much lower amount of oligotypes detected in relation to the samples. (B-C) Also, Alpha diversities  
 95 are much different with lower diversities observed in negative controls, corroborating the lower  
 96 amount of oligotypes detected. Concerning to the negative controls, the bacterial profile beta diversity  
 97 analysis like Bray-Curtis dissimilarity and Weighted UniFrac showed highly dissimilar profiles for  
 98 CNEs and CNRs. Except for four CNEs with similar profile to the samples, all the other ones represent  
 99 low abundance and random amplification profiles from laboratory reagents contaminants that is  
 100 widely discussed in high-throughput sequencing bacterial sequencing. These four CNEs with sample-  
 101 related profile were identified as basal contaminations from the samples in controls and used for an  
 102 internal investigation, process improvement and validation of the obtained results.
